# Supplementary material for: From Food Insufficiency towards Trade Dependency: A Historical Analysis of Global Food Availability
Source: PLoS One. 2013 Dec 18;8(12):e82714. doi: 10.1371/journal.pone.0082714 (PMC3867377; doi:10.1371/journal.pone.0082714)
Supplement: Data S1 — National level data on dietary energy supply (DES), dietary energy production (DEP), net food exports and animal based calorie supply. (XLSX) [file pone.0082714.s002.xlsx]

## Sheet: DES
DataS1
For article Porkka et al: From food insufficiency towards trade dependency: A historical analysis of global food availability.
		DES (kcal/cap/d)
Country	FAO ID	1965	1970	1975	1980	1985	1990	1995	2000	2005
Armenia	1	2559.69	2356.49	2157.5	2093.45	2105.67	2015.1	1975.33	2146.24	2225.21
Albania	3	1949.8	2089.77	2339.82	2427.11	2435.18	2290.52	2457.64	2366.28	2251.91
Algeria	4	1675.45	1832.65	2121.15	2585.64	2677.46	2883.9	2905.94	2975.73	3096.01
Angola	7	1859.8	1935.1	1906.23	1916.77	1653.7	1598.54	1651.81	1819.77	1942.86
Antigua and Barbuda	8	2137.53	2061.92	1806.17	1871.62	2170.5	2472.65	2178.76	2115.54	2219.81
Argentina	9	3122.91	3223.14	3160.06	3174.15	3055.11	2990.19	3137.16	3165.07	3022.15
Australia	10	3162.04	3219.87	3098.92	3071.53	3098.27	3112.32	3048.64	3041.07	3150.69
Austria	11	3224.26	3179.33	3190.27	3269.66	3319.52	3467.93	3537.29	3725.46	3727.6
Bahamas	12	2495.73	2581.14	2374.15	2522.95	2761.83	2719.09	2505.74	2705.88	2682.74
Barbados	14	2670.93	2834.86	2929.32	3041.83	3023.79	3032.3	2868.08	2820.31	2783.64
Belgium-Luxembourg	15	3335.08	3428.03	3497.4	3565.25	3765.57	3888.17	3901.34	3968.31	3931.15
Bangladesh	16	2000.34	1951.07	1983.75	2026.11	2067.71	2103.21	2039.18	2282.44	2413.1
Bermuda	17	2654.67	2853.6	2844.2	2994.67	3119.4	2862.99	2757.31	2567.76	2509.94
Bolivia (Plurinational State of)	19	1799.68	1965.68	2048.73	2087.34	2015.07	2045.4	2096.88	2148.64	2125.82
Botswana	20	1956.94	2017.44	1974.7	1992.25	2159.62	2185.64	2158.75	2125.78	2171.91
Brazil	21	2324.35	2438.3	2507.94	2678.54	2671.72	2750.09	2829.68	2894.73	3073.71
Belize	23	2249.98	2260.94	2338.14	2572.36	2456.5	2464.9	2452.6	2548.71	2685.13
Solomon Islands	25	2290.5	2288.04	2214.05	2231.65	2252.22	2177.76	2301.92	2384.98	2449.67
Brunei Darussalam	26	2207.39	2333.33	2186.45	2511.89	3418.57	4456.09	5086.2	4960.5	4674.82
Bulgaria	27	3415.47	3507.12	3543.93	3654.18	3667.7	3330.2	2826.29	2808.87	2777.03
Myanmar	28	1681.35	1841.95	1908.31	2077.01	2197	1994.57	2038.11	2108.8	2374.18
Burundi	29	2174.01	2135.77	2153.01	2082.13	1972.35	1921.92	1763.97	1718.47	1716.82
Cameroon	32	2017.6	2169.84	2275.3	2191.1	2080.81	2025.76	2032.37	2165.44	2286.22
Canada	33	2836.88	2839.36	2899.24	2872.88	2987.76	2986.24	3204.98	3470.46	3502.6
Cape Verde	35	1626.77	1716.31	1731.76	2234.19	2467.12	2527.19	2416.33	2383.33	2525.53
Central African Republic	37	2171.16	2293.71	2405.51	2298.24	1893.39	1856.53	1834.7	1922.34	1969.49
Sri Lanka	38	2242.88	2236.16	2174.56	2259.2	2269.3	2175.66	2221.81	2352.68	2324.91
Chad	39	2313.94	2077.57	1712.95	1621.29	1606.22	1714.88	1819.3	1998	2066.79
Chile	40	2545.83	2634.98	2535.2	2631.92	2480.72	2533.91	2713.46	2802.97	2929.29
Colombia	44	1780.24	1860.08	2029.75	2176.6	2182.32	2273.26	2452.9	2525.73	2554.15
Comoros	45	2221.53	2246.08	2223.81	2123.09	2122.91	2287	2255.24	2174.22	2261.73
Congo	46	2059.74	1953.07	1960.08	2044.48	2114.19	2043.77	1984.73	2206.8	2387.13
Costa Rica	48	2018.54	2182.57	2358.43	2434.39	2561.22	2777.31	2760.87	2807.34	2777.03
Cuba	49	2287.88	2554.13	2705.62	2848.73	3072.27	2817.42	2414.41	2975.14	3287.31
Cyprus	50	2736.44	3059.14	2502.99	2544.1	2820.46	2758.85	2802.85	2699.9	2561.73
Azerbaijan	52	3167.99	2940.11	2763.76	2710.39	2715.79	2587.71	2193.71	2412.83	2887.82
Benin	53	1780.41	1890.85	1832.42	1943.47	1971.04	2213.97	2330.17	2442.33	2569
Denmark	54	2948.37	3031.77	2914.03	2918.06	2906.51	3058.3	3196.14	3276.49	3387.71
Dominica	55	1863.57	1954.66	1993.12	2187.98	2501.94	2899.42	2847.5	2904.54	2997.8
Dominican Republic	56	1850.21	1970.82	2103.07	2208.86	2325.65	2240.17	2296.38	2282.92	2299.28
Belarus	57	3915.86	4061.3	4083.88	4054	3664.87	3380.09	3155.58	3025.38	2976.88
Ecuador	58	2002.73	2036.14	2075.15	2127.73	2122.88	2257.55	2329.2	2312.22	2223.21
Egypt	59	2257.74	2307.14	2477.07	2891.88	3068.53	3125.39	3262.47	3334.86	3276.78
El Salvador	60	1661.33	1749.61	1983.19	2218.32	2218.16	2341.82	2401.98	2537.55	2592.91
Estonia	63	2854.04	3004.57	3059.07	3101.73	3045.7	2925.47	2767.41	2983.8	3090.88
Fiji	66	2634.27	2461	2311.78	2456.86	2538.18	2624.46	2734.46	2855.18	3061.11
Finland	67	3006.71	3090.17	3118.22	3026	2971.6	3165.87	3029.15	3170.59	3178.4
France	68	3247.06	3239.04	3244.66	3394.25	3501.1	3528.74	3522.8	3616.04	3577.45
French Polynesia	70	2710.13	2793.85	2810.64	2729.47	2751.63	2787.65	2820.93	2780.73	2840.25
Djibouti	72	1627.18	1681.7	1718.25	1509.35	1622.33	1702.91	1874.55	1955.64	2202.84
Georgia	73	1862.13	1950.36	1962.51	1982.61	2006.84	1960.62	2062.72	2474.28	2788.71
Gabon	74	1990.91	2150.9	2362.55	2488.54	2540.71	2516.66	2558.03	2645.74	2681.91
Gambia	75	2243.48	2258.01	1867.73	1969.62	2335.37	2359.38	2231.69	2311.29	2329.08
Germany	79	3037.25	3150.68	3208.02	3338.26	3457.25	3440.05	3326.96	3444.34	3508.67
Bosnia and Herzegovina	80	1487.2	1456	1515.87	1538.7	1491.09	1384.31	1979.65	2189.15	2428.37
Ghana	81	2035.46	2237.43	2075.81	1717.55	1923.13	2132.44	2503.06	2650.23	2844.94
Kiribati	83	2594.71	2693.97	2869.96	2848.66	2625.96	2586.89	2724.56	2815.6	2855.71
Greece	84	2707.15	2947.82	3252.55	3268.45	3428.1	3553.5	3511.01	3604.36	3631.35
Grenada	86	2110.77	2293.87	2127.38	2323.58	2120.26	2419.53	2385.68	2263.54	2353.95
Guatemala	89	1851.07	1918.94	2006.81	2148.1	2133.28	2249.36	2175.87	2101.64	2140.17
Guinea	90	2058.57	2053.57	2225.34	2448.42	2508.79	2609.72	2422.45	2438.04	2555.34
Guyana	91	2298.57	2239.78	2433.39	2462.19	2554.05	2442.55	2630.81	2824.87	2810.77
Haiti	93	1777.17	1746.44	1813.81	1848.91	1802.06	1686.55	1711.62	1887.33	1846.16
Honduras	95	1860.21	1993.37	2048.81	2070.83	2141.2	2280.69	2357.63	2481.08	2594.56
Hungary	97	3254.52	3356.4	3405.24	3482.47	3662.71	3666.76	3331.26	3365.42	3435.67
Croatia	98	3141.65	3366.45	3643.14	3783.11	3981.31	3994.71	2459.08	2631.53	2956.56
Iceland	99	3401.54	3345.26	3332.22	3381.27	3445.56	3277.34	3212.45	3194.78	3281.44
India	100	1842.25	1907.67	1893.65	1934.67	2055.66	2207.93	2199.74	2226.72	2252.13
Indonesia	101	1714.72	1812.59	1957.46	2125.02	2338.91	2384.29	2431.1	2397.4	2437.29
Iran (Islamic Republic of)	102	1909.09	2091.4	2421.12	2664.04	2822.74	2955.28	3127.9	3102.21	3094.22
Ireland	104	3381.89	3421.52	3464.96	3519.72	3549.55	3579.68	3554.51	3698.9	3566.45
Israel	105	2895.91	3225.47	3267.15	3208	3371.29	3468.64	3479.26	3585.56	3608.93
Italy	106	3109.39	3385.62	3395.31	3519.79	3437.63	3543.98	3509.67	3685.77	3650.27
Côte d'Ivoire	107	2451.47	2531.91	2570.21	2798.32	2643.26	2524.77	2471.59	2546.01	2671.44
Kazakhstan	108	3950.22	3807.27	3670.1	3603.31	3596.13	3559.35	3113.27	2552.25	3224.95
Jamaica	109	2252.96	2574.75	2707.01	2711.32	2654.52	2575.71	2676.67	2753	2810.69
Japan	110	2810.53	2922.87	2927.18	2888.89	2951.06	3001.21	2958.52	2903.17	2840.78
Jordan	112	3678.21	2142.09	2196.97	2506.62	2567.5	2669.93	2602.33	2716.89	3075.42
Kyrgyzstan	113	4125.15	3780.03	3537.5	3363.82	3354.66	3100.21	2491.46	2463.42	2771.29
Kenya	114	2285.91	2336.8	2344.61	2313.42	2186.15	2017.17	2014.75	2060.33	2052.3
Cambodia	115	2007.3	2058.65	1778.87	1783.45	1815.51	1911.79	1959.4	2093.09	2279.76
Democratic People's Republic of Korea	116	2036.84	2077.48	2168.71	2219.37	2100.19	2263.25	2180.97	2118.46	2125.41
Republic of Korea	117	2319.96	2738.84	3009.04	2980.39	2948.84	2974.98	3053.17	3076.93	3094.43
Kuwait	118	2580.33	2567.07	2592.51	2937.56	2998.33	2042.52	3029.35	3370.37	3565.26
Latvia	119	3085.56	3250.23	3338.42	3404.19	3449.96	3372.47	3120.63	2879.14	2966.5
Lao People's Democratic Republic	120	2009.48	2025.6	1976.12	1992.72	1962.1	1999.32	2032.46	2129.99	2257.81
Lebanon	121	2342.79	2365.29	2330.87	2605.92	2741.59	3025.47	2999.84	3059.04	3108.22
Lesotho	122	2046.65	2030.63	2133.9	2298.42	2280.68	2276.5	2293.44	2321.73	2370.75
Liberia	123	2170.96	2276.87	2337.94	2484.27	2402.94	2358.48	2067.51	2074.02	2247.68
Libya	124	2622.76	3317.35	4477	5331.15	3611.2	3266.96	3209.07	3150.05	3208.99
Lithuania	126	3503.64	3619.53	3576.09	3511.28	3322.44	3146.33	2925.17	3297.4	3410.6
Madagascar	129	2481.69	2556.03	2567.65	2455.08	2439.69	2205.16	2079.98	2042.51	2075.38
Malawi	130	2205.39	2331.62	2386.24	2257.27	2082.85	1900.49	2004.75	2179.26	2221.32
Malaysia	131	2435.4	2551.56	2634.14	2734.35	2699.42	2684.1	2922.03	2872.8	2831.44
Maldives	132	1712.95	1810.03	1943.51	2295.68	2374.54	2447.71	2445.78	2521.78	2606.49
Mali	133	1644.52	1683.19	1654.5	1574.86	1867.21	2176.76	2132.28	2196.32	2283.76
Malta	134	2870.14	3036.94	3141.63	3140.95	3001.01	3148.85	3283.12	3425.89	3493.89
Mauritania	136	2212.63	2059.8	2035.73	2177.49	2518.23	2596.37	2661.65	2727.72	2728.11
Mauritius	137	2333.69	2315.7	2455.63	2653.68	2711.97	2757.31	2782.49	2874.78	2923.1
Mexico	138	2283.4	2502.35	2690.88	3013.25	3085.71	3054.65	3092.29	3154.66	3210.29
Mongolia	141	2223.39	2188.43	2235.87	2362.5	2340.78	2212.5	1988.17	2166.56	2249.62
Morocco	143	2231.34	2426.72	2597.1	2722.31	2871.69	3006.79	2995.75	3100.38	3232.24
Mozambique	144	1853.75	1830.58	1883.8	1820.34	1752.8	1781.47	1832.1	1961.17	2061.18
Republic of Moldova	146	2521.83	2613.96	2606.43	2617.41	2583.25	2464.74	2761.77	2628.64	2838.57
Namibia	147	2233.91	2204.07	2154.7	2223.77	2150.28	2058.63	2036.77	2137.99	2234.65
Nepal	149	1746.18	1763.97	1749.01	1761.26	1934.19	2221.3	2211.5	2253.32	2333.17
Netherlands	150	3118.94	3157.15	3235.93	3260.16	3269.44	3286.59	3285.47	3254.68	3208.1
Netherlands Antilles	151	3048.22	3163.63	3308.85	3767.1	3076.97	2558.33	2861.64	2978.34	2977.5
New Caledonia	153	2925.61	3193.73	3060.69	2940.37	2897.51	2876.24	2818.21	2810.9	2785.99
The former Yugoslav Republic of Macedonia	154	4118.23	4097.89	4100.3	3996.31	3985.97	3848.64	2600.29	2805.69	2936.14
Vanuatu	155	2535.29	2605.5	2519.21	2585.62	2711.8	2588.29	2634.92	2716.02	2774.2
New Zealand	156	3069.38	3077.01	3160.3	3117.99	3115.12	3205.59	3223.46	3179.4	3132.93
Nicaragua	157	2010.39	2093.7	2082.78	2073.44	2182.86	1929.67	1941.64	2175.82	2369.58
Niger	158	1752.07	1929.94	1953.28	2061.07	2042.71	2022.02	1961.69	2178.92	2300.81
Nigeria	159	1833.2	1813.59	1756.91	1774.45	1826.81	2196.85	2530.54	2602.51	2677.91
Norway	162	3044.37	3052.98	3061.02	3202.05	3161.79	3163.72	3250.66	3360.87	3463.26
Pakistan	165	1802.9	2010.02	2025.1	1977.56	2004.65	2132.54	2316.29	2310.46	2315.3
Panama	166	2144.41	2225.32	2268.13	2191.9	2364.03	2234.3	2302.14	2299.35	2390.82
Czech Republic	167	2438.55	2491.21	2511.72	2542.69	2621.07	2630.24	2462.02	2475.84	2526.96
Paraguay	169	2283.78	2422.08	2452.42	2517.1	2534.16	2438.92	2549.06	2639.6	2632.83
Peru	170	2111.22	2175.44	2098.54	2087.18	2150.84	2146.52	2224.83	2315.43	2399.68
Philippines	171	1870.56	1881.86	2057.73	2224.62	2125.39	2218.66	2305.26	2368.95	2465.99
Poland	173	3527.12	3643.11	3735.46	3656.82	3589.59	3443.32	3340.74	3405.41	3389.19
Portugal	174	2675.09	2951.93	2922.86	2718.96	2974.19	3323.87	3394.81	3509.24	3552.3
Guinea-Bissau	175	1795.67	1798.33	1880.23	2007.28	2196.31	2271.85	2302.05	2286.92	2426.79
Timor-Leste	176	1723.57	1735.62	1748.98	2147.19	2114.37	2007.26	1983.36	1962.23	2002.66
Eritrea	178	1793.9	1839.1	1509.09	1612.61	1554.11	1563.73	1552.11	1530.8	1558.96
Zimbabwe	181	2137.29	2263.81	2272.52	2245.41	2084.76	1994.98	1935.08	1974.05	2151.83
Romania	183	2970.81	3009.69	3227.44	3229.01	3077.32	2987.26	3031.72	3183.24	3450.8
Rwanda	184	1951.03	2151.48	2180.26	2268.74	2190.32	1822.45	1890.33	1831.6	2003.46
Russian Federation	185	3186.05	3388.03	3503.16	3550.41	3609.84	3522.99	2898.61	2919.82	3201.97
Serbia and Montenegro	186	4063.6	4237.6	4458.69	4527.28	4501.75	4411.74	2938.42	2717.63	2695.89
Saint Kitts and Nevis	188	1939.88	2089.16	2198.52	2284.16	2500.18	2547.14	2375.1	2376.09	2407.03
Saint Lucia	189	1818.08	1972.79	2034.75	2274.59	2443.24	2517.67	2707.5	2664.53	2707.37
Saint Vincent and the Grenadines	191	2066.65	2340.23	2310.15	2456.19	2468.1	2369.25	2377.22	2601.77	2800.83
Sao Tome and Principe	193	2280.46	2135.54	2011.66	2046.01	2029.08	2180.23	2238.47	2364.4	2616.12
Saudi Arabia	194	1838.46	1881.24	1892.75	2805.49	2693.17	2812.22	2819.95	3070.8	3013.75
Senegal	195	2583.92	2293.05	2252.93	2340.62	2351.08	2235.86	2217.55	2229.01	2369.87
Seychelles	196	1809.95	2033.87	2161.26	2249.07	2150.18	2269.48	2343.15	2383.16	2359.31
Sierra Leone	197	2101.68	2223.21	2144.55	2141.17	2023.57	1984.99	2087.69	2065.25	2073.98
Slovenia	198	3683.97	3830.28	4034.17	4079.1	4156.22	4134.83	2941.46	3028.79	3185.67
Slovakia	199	5436	5186.44	4918.57	4815.64	4879.18	4877.29	2914.65	2847.05	2840.57
South Africa	202	2738.6	2790.34	2865.79	2856.62	2854.76	2830.77	2808.06	2876.67	2978.61
Spain	203	2680.24	2717.57	2953.98	3036.32	3087.47	3306.47	3306.76	3386.18	3280.42
Sudan	206	1717.8	1931.05	2020.39	2095.81	1998.73	2027.41	2157.93	2177.37	2265.12
Suriname	207	2185.18	2241.91	2272.45	2353.16	2593.18	2465.16	2503.87	2463.61	2458.98
Tajikistan	208	3705.64	3308.01	2953.68	2732.07	2596.12	2288.51	1931.01	1885.67	2134.16
Swaziland	209	2067.61	2214.08	2365.85	2369.09	2443.34	2437.15	2255.03	2307.64	2351.11
Sweden	210	2794.25	2784.73	2889.3	2934.02	2942.18	2969.91	3105.09	3097.49	3118.73
Switzerland	211	3329.15	3386.23	3307.81	3412.61	3363.9	3397.82	3332.31	3368.56	3419.53
Syrian Arab Republic	212	2205.63	2414.38	2600.28	2993.9	3042.78	2902.59	2998.69	3150.65	3152.45
Turkmenistan	213	4861.1	4434.71	4013.78	3761.64	3643.06	3304.11	2557.55	2598.64	2802.17
United Republic of Tanzania	215	1749	1701.88	2077.23	2217.45	2237.12	2158.47	1962.39	1971.17	1996.58
Thailand	216	2067.68	2135.18	2264.26	2327.9	2258.85	2289.85	2503.87	2519.33	2586.94
Togo	217	2269.96	2154.74	1918.29	2064.14	1942.12	2028.99	2157.89	2217.41	2357.63
Trinidad and Tobago	220	2521.04	2494.53	2741.6	2974.71	2947.52	2698.03	2587.44	2669.57	2707.94
Tunisia	222	2244.24	2362.42	2614.78	2801.09	3014.92	3117.04	3183.86	3294.25	3290.41
Turkey	223	2975.94	3115.42	3248.29	3374.29	3549.95	3733.33	3680.11	3617.83	3624.77
United Arab Emirates	225	3287.8	5318.02	5316.57	4707.05	5182.65	5556.11	4123.96	4115.94	3718.98
Uganda	226	2282.41	2386.81	2347.76	2136.76	2140.92	2269.74	2230.9	2290.03	2289.75
United Kingdom	229	3243.79	3232.4	3161.08	3119.35	3166.43	3200.37	3202.87	3362.78	3426.49
Ukraine	230	3064.81	3173.93	3224.66	3281.03	3355.03	3347.37	2961.94	2908	3187.02
United States of America	231	2936.81	3053.08	3108.76	3219.64	3376.8	3551.47	3697.83	3788.16	3881.79
Burkina Faso	233	1696.58	1679.63	1588.63	1691.3	1889.34	2266.86	2410.91	2404.76	2582.21
Uruguay	234	2772.92	2865.1	2816.62	2786.28	2590.69	2594.42	2721.68	2764.44	2792.18
Uzbekistan	235	4803.96	4377.1	3945.21	3694.91	3546.87	3227.8	2665.31	2374.31	2501.87
Venezuela (Bolivarian Republic of)	236	2177.26	2307.06	2418.16	2705.3	2598.67	2491	2401.57	2398.05	2551.06
Viet Nam	237	1875.59	1932.71	1899.99	1918.55	2020.5	2015.12	2235.71	2488.85	2753.82
Ethiopia	238	1814.42	1700.38	1560.55	1837.46	1721.7	1672.84	1607.54	1797.19	1940.88
Samoa	244	1980.82	2187.68	2354.05	2401.23	2550.75	2546.83	2414.63	2693.79	2835.68
Yemen	249	1812.91	1831.4	1953.48	2120.09	2137.26	2145.93	2056.73	2100.34	2085.78
Democratic Republic of the Congo	250	2127.6	2114.14	2122.94	2037.84	2072.4	2087.61	1757.9	1521.26	1498.27
Zambia	251	2203.68	2318.42	2401.12	2292.12	2094.39	2052.44	2017.59	1940.09	1936.27
China	351	1787.78	1829.24	1918.68	2178.26	2457.67	2501.87	2728.39	2856.27	2914.78

## Sheet: DEP
DataS1
For article Porkka et al: From food insufficiency towards trade dependency: A historical analysis of global food availability.
		DEP (kcal/cap/d)
Country	FAO ID	1965	1970	1975	1980	1985	1990	1995	2000	2005
Armenia	1	1784.98	1636.54	1101.24	282.774	-27.6513	228.934	599.224	726.642	653.533
Albania	3	1356.47	1701.09	2037.82	2210.33	2123.91	1371.2	1158.01	756.195	358.121
Algeria	4	1248.09	1272.34	919.39	560.929	310.808	332.611	392.628	318.072	586.742
Angola	7	2283	2268.15	1825.37	1231.41	1060.38	1035.95	1110.31	1194.13	1081.08
Antigua and Barbuda	8	2759.98	837.36	172.025	175.139	160.856	163.214	134.76	201.631	-182.878
Argentina	9	6688.85	6058.88	6473.67	7461.61	7952.4	7881.31	9186.75	12284.4	14251.3
Australia	10	10367.9	10275.3	10643.4	11759.3	12827.5	10887.2	12711.5	13738.3	11335.8
Austria	11	2129.57	2436.36	2745.57	3080.18	3629.81	3579.33	3330.46	3553.65	3112.98
Bahamas	12	-93.8216	365.442	334.262	294.635	-62.9541	55.6677	17.3486	-211.914	-150.312
Barbados	14	7797.77	5789.74	4112.04	3158.77	2334.09	1384.18	494.655	644.122	-166.102
Belgium-Luxembourg	15	1845.26	1397.41	1621.22	2604.87	2833.9	2172.4	1927.53	1075.13	869.973
Bangladesh	16	1932.92	1784.14	1865.5	1865.51	1814.61	1793.27	1649.85	1932.85	1990.69
Bermuda	17	-1302.77	-1429.29	-886.837	-648.51	-727.429	-552.113	-436.697	-269.031	-355.539
Bolivia (Plurinational State of)	19	1343.61	1484.79	1759.22	1686.8	1616.46	1825.77	2276.53	2453.31	2241.92
Botswana	20	898.957	1066.13	1347.35	693.943	416.605	537.881	596.202	351.412	454.777
Brazil	21	2355.17	2544.28	2919.13	2783.07	2932.97	2831.01	3087.54	3801.32	5234.69
Belize	23	4413.65	6012.51	6742.02	8200.45	7125.4	6163.74	6440.78	6355.09	6048.2
Solomon Islands	25	4574.38	4208.62	4084.18	5587.19	5294.2	4768.01	4659.64	4051.6	3787.62
Brunei Darussalam	26	143.283	162.688	165.039	-92.8475	-830.56	-1436.2	-442.293	-899.613	-1694.01
Bulgaria	27	3739.42	3804.06	3542.11	3729.24	2931.59	2788.65	2933.92	3359.69	3574.34
Myanmar	28	2197.98	2033.47	1993.26	2257.67	2369.95	2009.19	2164.95	2269.77	2686.18
Burundi	29	2159.11	2105.49	2124.59	2022.27	1907.42	1913.09	1707.73	1639.02	1547.65
Cameroon	32	2590.28	2766.48	2778.74	2450.07	2263.66	2046.94	2133.47	2132.03	2260.32
Canada	33	7898.33	6605.44	7311.44	8675.03	9687.74	9192.03	9187.51	8288.78	8929.05
Cape Verde	35	1158.13	177.586	24.7642	-324.83	-289.72	-232.432	-652.863	-214.955	-755.768
Central African Republic	37	2164.34	2268.59	2385.12	2254.69	1847.05	1689.7	1681.94	1808.81	1839.63
Sri Lanka	38	1558.7	1630.94	1539.65	1778.92	1790.51	1551.46	1502.68	1509.83	1580.78
Chad	39	2438.7	1988.46	1619.66	1482.37	1455.18	1646.04	1681.43	1931.72	2004.29
Chile	40	2297.42	2176.89	1854.54	2338.54	3262.48	3692.64	3257.72	2360.12	2111.39
Colombia	44	1713.15	1808.76	1903.91	2024.48	1893	2104.05	1950.9	1908.05	1970.52
Comoros	45	2029.17	1906.76	1785.74	1490.43	1273.53	1428.23	1415.91	1351.82	1341.52
Congo	46	2280.62	2207.12	1823.58	1682.25	1720.99	1457.48	1394.35	1349.48	1367.77
Costa Rica	48	2420.07	3045.54	3373.74	3057.19	3023.84	2971.89	3031.97	2855.84	2935.98
Cuba	49	6635.64	6827.93	6754.53	7904.6	7671.19	7100.35	3936.85	3888.41	1895.07
Cyprus	50	2160.79	2048.29	435.747	1590.98	-1052.62	-2526.65	-3463.72	-2262.46	-865.822
Azerbaijan	52	2740.97	2358.63	2018	1320.54	1146.97	1178.52	1160.35	1513.98	1618.74
Benin	53	1954.28	2077.5	1945.96	1827.24	1797.5	1804.05	1822.83	2244.56	2176.09
Denmark	54	4216.82	4911.45	5874.26	6677.23	7104.03	8628.17	8170.43	6891.39	5405.29
Dominica	55	2185.07	2014.8	1828.81	881.501	908.408	-1193.23	-2552.52	-1305.55	-1078.22
Dominican Republic	56	3254.15	3462.75	3518.61	3008.42	2515.77	1609.9	1186.74	622.097	443.283
Belarus	57	3634.45	3613.49	3257.8	2468.44	1784.85	1575.52	1920.41	1784.09	2706.77
Ecuador	58	2435.58	2385.09	2290.48	2195.49	2092.17	2322.78	2707.58	2503.54	2452.39
Egypt	59	1751.57	1809.65	1670.6	1408.99	1226.03	1594.04	1844.35	1824.04	1974.49
El Salvador	60	1514.48	1726.41	1971.43	1897.47	1711.81	1700.54	1563.55	1586.29	1538.89
Estonia	63	2789.57	2720.5	2191.95	1212.57	931.819	621.675	2098.52	1147.7	2012.87
Fiji	66	7975.77	7347.55	5688.45	6908.94	5926.37	5783.89	5556.06	4199.01	3696.43
Finland	67	2587.8	2976.99	3204.42	2383.39	3213.26	3505.41	3573.54	3233.35	3766.86
France	68	3829.45	4708.98	4988.33	6195.03	6988.32	7779.16	7231.23	7585.82	6763.97
French Polynesia	70	4572.77	2094.35	1708.11	1331.13	685.972	293.196	1.23305	-233.616	-333.015
Djibouti	72	209.409	193.593	166.585	146.65	114.581	103.711	-92.2354	-502.58	-1531.45
Georgia	73	1169.16	1328.21	898.985	72.4404	-424.072	-97.1193	618.75	718.865	495.869
Gabon	74	1917.06	1968.7	1652.41	1570.68	1520.79	1584.2	1426.33	1355.5	1136.37
Gambia	75	4157.39	3979.2	3178.65	2077.48	1704.23	1068.75	987.924	623.451	267.083
Germany	79	1633.03	1763.59	2072.4	2654.85	3149.94	3267.13	3347.26	3782.15	3033.13
Bosnia and Herzegovina	80	1825.54	1308.94	1694.45	1350.51	1226.63	1187.35	1555.68	1210.56	729.582
Ghana	81	2111.25	2224.78	2036.56	1642.77	1799.32	1953.15	2393.31	2520.75	2451.59
Kiribati	83	8736.29	6379.27	6778.08	6826.42	5338.28	5260.28	4791.61	4250.73	2752.54
Greece	84	2889.03	2841.02	2867.03	3581.12	3614.59	3641.59	3031.7	2474.17	1828.78
Grenada	86	1610.9	1681.15	1362.52	1360.93	871.882	625.92	8.51001	34.0945	-205.414
Guatemala	89	1850.58	2003.15	2256.55	2258.64	2316.53	2569.66	2587.47	2583.02	2484.78
Guinea	90	1879.74	1947.55	2055.71	2178.1	2140.89	2008.77	1830.4	1915.54	2040.48
Guyana	91	7336.05	6691.23	6388.64	6330.93	5459.82	4658.5	8141.45	8224.43	7703.87
Haiti	93	1685.92	1657.68	1550.86	1398.35	1302.79	1038.81	824.827	814.756	660.181
Honduras	95	2406.86	2523.59	2258.23	2423.26	2524.44	2363.69	2173.9	2025.84	2214.29
Hungary	97	3465.87	3751.59	4128.63	4946.07	5595.6	5987.3	4953.16	5520.27	6073.86
Croatia	98	3475.12	3245.59	3892.2	3679.95	4214.36	4299.1	2255.77	2445.79	2200.25
Iceland	99	13332.8	8052.93	11881.4	14086.1	13715.4	12096.2	15464.1	14907	12077.5
India	100	1706.05	1858.8	1878.61	1883.79	1995.27	2198.14	2256.58	2191.42	2190.32
Indonesia	101	1695.91	1813.1	1878.82	2068.24	2363.28	2506.84	2496.01	2664.8	3373.59
Iran (Islamic Republic of)	102	1554.67	1742.67	1837.22	1668.86	1629.74	1630.87	1981.9	1752.12	2250.85
Ireland	104	2686.01	3214.95	3754.97	4951.9	5484.91	5977.34	5369.82	4714.68	3601.58
Israel	105	1007.08	1003.46	1038.45	173.277	24.3485	-1940.18	-2684.76	-2676.98	-2778.92
Italy	106	2065.99	2145.71	2160.31	2576.59	2639.68	2558.44	2533.08	2501.16	1824.44
Côte d'Ivoire	107	2417.98	2547.75	2864.55	2872.48	2760.32	2738.17	2647.99	2627.73	2610.71
Kazakhstan	108	5512.8	5753.77	4929.84	3995.73	3848.69	3528.64	3818.2	4767.94	5074.58
Jamaica	109	3527.34	2698.72	2015.5	1433.66	1299.44	1292.29	1265.13	1000.99	760.794
Japan	110	1582.44	1097.58	1118.64	823.288	812.898	634.343	368.271	316.445	306.045
Jordan	112	2082.1	860.111	461.147	238.839	-616.435	-1118.69	-1578.14	-1174.1	-1424.42
Kyrgyzstan	113	3869.31	3339.06	2926.34	2158.09	1935.38	1867.41	1727.3	2134.7	2119.77
Kenya	114	2265.08	2369.49	2494.9	2143.64	2017.78	1999.74	1623.96	1520.4	1530.56
Cambodia	115	2821.58	2782.84	1127.96	1444.01	1565.66	1774.46	1768.47	2107.62	2492.42
Democratic People's Republic of Korea	116	1928.28	1825.82	2014.35	2028.82	1941.7	2048.52	1727.5	1481.83	1538.73
Republic of Korea	117	2126.35	2051.28	2100.47	1617.97	1210.13	646.366	231.847	241.205	130.389
Kuwait	118	64.9303	-4.62677	52.564	130.736	218.976	-550.158	-1162.65	-1074	-928.176
Latvia	119	3147.92	2999	2810.17	2321.18	2306.75	2189.94	2355.13	2245.38	2901.2
Lao People's Democratic Republic	120	1713.97	1805.66	1562.48	1829.09	2094.51	1965.9	1900.44	2452.71	2828.59
Lebanon	121	800.396	573.971	433.762	349.967	468.633	558.907	-220.555	-351.848	-242.312
Lesotho	122	1703.64	1273.56	1293.47	1205.34	731.221	831.98	850.163	742.505	350.712
Liberia	123	1755.17	1878.97	2043.45	1965.37	1877.76	1715.89	1233.82	1280.03	1165.92
Libya	124	712.886	470.928	236.109	157.262	-200.905	-911.853	-738.807	-668.794	-813.882
Lithuania	126	3826.71	3778.06	3219.25	2216.19	1964.83	1641.28	3350.14	2990.67	4057.14
Madagascar	129	2661.7	2642.26	2505.53	2225.2	2258.2	2151.13	2049.05	1804.72	1782.53
Malawi	130	2449.28	2525.36	2560.67	2502.97	2203.06	1637.51	1760.99	2210.7	2124.94
Malaysia	131	1763.21	2551.29	4042.59	5874.34	7343.42	9141.23	10161.8	11676.1	14197.7
Maldives	132	939.756	1132.67	983.581	834.654	998.599	1035.25	823.705	803.443	760.171
Mali	133	1694.76	1522.55	1545.39	1466.06	1602.28	2023.75	1949.84	1940.97	2171.83
Malta	134	-686.325	-1150.27	-1611.03	-1110.34	-1320.66	-1616.98	-1554.26	-1741.44	-2114.38
Mauritania	136	1628.79	1363.48	822.859	869.344	830.969	855.992	1054.74	671.293	597.857
Mauritius	137	8596.24	7910.59	7507.42	6248.79	6000.6	5263.88	4321.3	3805.61	3293.08
Mexico	138	2731.91	2639.22	2461.05	2428.31	2415.66	2079.64	2107.11	1720.37	1370.15
Mongolia	141	2144.3	1600.41	1779.46	1637.2	2187.26	2040.01	1428.13	1281.12	1040.1
Morocco	143	1901.91	2397.27	1797.59	1676.1	1817.93	2292.79	1718.22	1217.99	1675.22
Mozambique	144	2128.15	2188.25	2051.84	1682.59	1425.62	1305.06	1480.82	1701.55	1579.42
Republic of Moldova	146	3117.7	2880.22	2650.95	2152.46	2138.38	1968.81	3448.28	3017.11	3501.24
Namibia	147	1492.24	1510.44	1349.55	1318.54	1138.33	1105.18	1264.6	1087.93	1222.99
Nepal	149	2046.67	1966.59	1949.36	1726.64	1878.76	2136.12	2149.18	2191.08	2216.17
Netherlands	150	1388.93	1703.14	2231.74	3123.18	3010.3	1330.22	563.613	-644.809	-1248.8
Netherlands Antilles	151	-788.665	-852.079	-914.565	-1094.57	-780.445	-420.994	-472.057	-518.745	-1062.22
New Caledonia	153	873.196	472.828	369.314	210.049	146.567	-109.959	-502.98	-492.968	-805.678
The former Yugoslav Republic of Macedonia	154	2603.51	3406.51	3399.74	2824.53	3204.4	3525.9	1334.16	1252.24	1474.46
Vanuatu	155	10408.3	8242.54	7665.32	7815.25	7297.37	5895.16	5628.6	4887.6	4503.03
New Zealand	156	7409.02	8191.35	7815.73	8561.23	9601.77	8196.83	8467.13	9117.95	9134.53
Nicaragua	157	2150.63	2455.46	2325.54	2060.97	1831.91	1554.21	1747.47	1909.13	2324.96
Niger	158	2870.86	2321.35	1712.85	2223.81	1626	1893.43	1540.91	1912.61	2039.33
Nigeria	159	2140.99	1952.12	1674.33	1380.91	1582.77	2100.07	2358.36	2297.09	2324.76
Norway	162	3194.43	3045.7	3578.31	3225.65	2879.71	1672.01	1962.97	1869.26	1278.2
Pakistan	165	1600.39	1958.77	1977.03	2008.51	1957.12	2001.46	2136.48	2223.47	2310.12
Panama	166	2134.14	2266.51	2498.34	2546.18	2289.9	1954.77	1801.33	1340.28	1287.8
Czech Republic	167	2195.97	2258.51	2448.24	2427.37	2823.22	2717.56	2589.42	2408.48	2603
Paraguay	169	2252.98	2356.53	2514.47	2633.9	2579.76	5504.32	6295.11	7477.12	9680
Peru	170	3659.32	3563.8	2297.98	1780.5	1677.87	1906.57	2119.75	2059.12	1967.29
Philippines	171	2523.53	2479.6	2839.17	2918.92	2505.84	2434.59	2345.58	2211.19	2369.1
Poland	173	3300.59	3248.99	3051.81	2624.83	3146.39	3245.35	3134.91	3167.86	3263.8
Portugal	174	2048.51	1794.69	1077.67	105.339	1058.86	811.958	454.486	-61.2741	-331.09
Guinea-Bissau	175	2056.54	1653.7	1717.1	1661.2	1930.65	1895.83	2026.18	2308.59	2482.03
Timor-Leste	176	1159.02	1176.1	1247.82	1599.99	1569.51	1595.76	1634.73	1374.45	1213.95
Eritrea	178	1954.66	2083	1542.19	1384.9	944.405	867.484	587.183	740.445	624.476
Zimbabwe	181	2641.81	3218.06	3181.12	2890.38	2465.51	2157.26	2061.36	1754.38	1556.35
Romania	183	3870.95	3583.99	3503.46	3100.9	3251.88	2660.58	3303.21	2716.44	2841
Rwanda	184	1838.07	2124.6	2140.48	2320.77	2118.74	1689.68	1562.81	1683.23	1765.75
Russian Federation	185	3094.91	3002.86	2878.38	2230.52	2295.84	2124.19	2103.54	2299.36	3065.15
Serbia and Montenegro	186	4597.65	4245.94	4896.78	4456.18	4588.48	4631.78	3058.2	2926.68	3268.93
Saint Kitts and Nevis	188	7946.52	6137.5	6769.05	8291.4	6171.19	5581.15	5226.18	3503.22	1911.97
Saint Lucia	189	2811.17	2438.76	2004.78	1848.03	1930.11	2218.47	1780.8	657.178	372.827
Saint Vincent and the Grenadines	191	2719.09	2075.94	1749.33	1742.28	2178.77	2195.05	1233.94	839.684	745.485
Sao Tome and Principe	193	4093.53	3522.08	1580.97	1325.52	1265.58	1078.92	1580.41	1555.21	1516.28
Saudi Arabia	194	895.159	691.474	421.771	-712.535	-645.024	1203.3	-153.413	-192.748	-253.253
Senegal	195	3934.44	2267.74	2297.69	2033.08	1607.74	1535.84	1365.54	1150.68	894.888
Seychelles	196	3421.57	2477.85	1477.76	977.558	371.307	-773.952	-1376.9	-1244.29	-3577.75
Sierra Leone	197	1905.85	1930.18	1997.45	1855.76	1674.77	1560.6	1589.91	1254.23	1704.91
Slovenia	198	1716.91	1808.31	2597.74	1703.39	2636.83	2682.05	72.6958	340.241	377.174
Slovakia	199	2557.14	2540.27	3473.37	3850.96	4543.48	4653.92	2840.75	2811.21	3156.41
South Africa	202	4013.2	3953.56	4000.07	4345.44	2716.63	2900.78	2754.48	2641.44	2356.71
Spain	203	2242.28	2271.61	2247.58	2259.04	2578.76	2465.97	1921.32	1697.94	929.551
Sudan	206	1925.44	1931.36	2325.5	2097.28	1770.43	1868.25	2023.18	1955.62	2118.2
Suriname	207	2045.69	2109.53	2432.88	3278.64	3960.01	2322.77	2540.31	1520.68	1221.24
Tajikistan	208	2614.27	2319.21	1436.44	245.752	-123.57	120.874	756.932	927.215	901.569
Swaziland	209	4052.5	4968.28	5251.08	6279.96	7192.75	6261.7	5328.99	5077.39	5548.24
Sweden	210	2502.18	2762.61	3157.81	3112.71	3306.01	3080.59	3254.22	3561.26	3042.65
Switzerland	211	919.127	848.346	913.055	1288.38	1294.25	1569.25	1626.7	1550.9	1427.74
Syrian Arab Republic	212	2364.7	1975.88	2082.38	2457.41	1744.44	1940.67	2560.9	2300.2	2126.54
Turkmenistan	213	3923.13	3499.57	2383.45	995.709	656.016	785.346	1360.4	2191.9	2709.41
United Republic of Tanzania	215	1879.99	1672.69	1999.72	2178.4	2198.04	2110.68	1801.24	1790.67	1673.91
Thailand	216	3160.45	3306.38	3909.9	4620.11	4929.68	4839.6	4807.33	4911.2	5539.58
Togo	217	2400.93	2285.91	1911.04	1878.72	1731.69	1723.81	1962.93	1824.87	1851.09
Trinidad and Tobago	220	2644.77	2323.36	1650.3	569.308	180.556	160.641	437.892	513.347	22.0381
Tunisia	222	1928.55	1671.37	2083.62	1615.71	1738.77	1705.16	1533.71	1323.98	1826.54
Turkey	223	2847.89	3078.16	3388.2	3705.63	3614.7	3882.56	3662.55	3616.57	3421.6
United Arab Emirates	225	156.915	-629.195	-1253.61	-1164.38	-1020.42	-1549.14	-2548.48	-3238.66	-4770.52
Uganda	226	2347.57	2519.61	2419.88	2085.28	2113.26	2237.54	2094.41	2160.46	2056.79
United Kingdom	229	723.709	696.341	1027.8	1930.72	2526.46	2447.6	2456.91	2314.61	1973.06
Ukraine	230	3655.6	3614.22	3455.68	3145.42	3214.24	3092.2	3635.07	3910.21	4798.12
United States of America	231	4170.76	4346.44	5974.76	7311.22	6920.19	6412.39	6747.25	6870.88	7210.2
Burkina Faso	233	1689	1560.93	1540.74	1583.31	1741.91	2097.72	2040.43	2205.62	2301.26
Uruguay	234	3084.6	3120.41	3619.34	3916.62	3979.59	4478.4	5287.6	5420.4	8022.27
Uzbekistan	235	4095.18	3666.02	2945.96	2011.23	1609.46	1660.92	1716.4	2001.62	2187
Venezuela (Bolivarian Republic of)	236	1435.37	1623.79	1399.14	1097.28	1096.64	1129.52	1020.98	1100.9	1175.13
Viet Nam	237	1692.43	1544.16	1569.23	1709.88	1982.87	2192.23	2556.32	3057.27	3455.28
Ethiopia	238	1953.67	1909.82	1563.5	1823.11	1619.29	1503.87	1534.72	1601.04	1858.74
Samoa	244	3455.05	3484.96	3501.46	3724.94	3624.89	2507.05	1842.07	1833.09	1926.53
Yemen	249	1457.24	1236.14	1317.25	1069.03	633.949	625.931	517.577	451.195	428.857
Democratic Republic of the Congo	250	2231.77	2215.2	2094.55	1972.97	2045.7	2077.3	1706.99	1400.62	1180.89
Zambia	251	2089.56	2202.4	2858.14	1828.23	1825.86	1992.08	1727.88	1319.99	1582.05
China	351	1759.73	1794.05	1865.1	2043.12	2432.43	2546.73	2659.27	2566.93	2449.53

## Sheet: TRADE
DataS1
For article Porkka et al: From food insufficiency towards trade dependency: A historical analysis of global food availability.
		Net exports (kcal/cap/d)
Country	FAO ID	1965	1970	1975	1980	1985	1990	1995	2000	2005
Armenia	1	-774.715	-719.951	-1056.26	-1810.68	-2133.32	-1786.17	-1376.1	-1419.6	-1571.68
Albania	3	-593.327	-388.678	-301.997	-216.788	-311.274	-919.324	-1299.63	-1610.09	-1893.79
Algeria	4	-427.365	-560.316	-1201.76	-2024.72	-2366.65	-2551.29	-2513.31	-2657.66	-2509.27
Angola	7	423.195	333.05	-80.8604	-685.367	-593.324	-562.588	-541.496	-625.633	-861.778
Antigua and Barbuda	8	622.455	-1224.56	-1634.14	-1696.48	-2009.64	-2309.44	-2044	-1913.91	-2402.68
Argentina	9	3565.93	2835.73	3313.61	4287.46	4897.29	4891.12	6049.59	9119.32	11229.1
Australia	10	7205.89	7055.44	7544.53	8687.78	9729.24	7774.91	9662.91	10697.2	8185.13
Austria	11	-1094.7	-742.972	-444.698	-189.487	310.292	111.403	-206.83	-171.808	-614.624
Bahamas	12	-2589.55	-2215.69	-2039.89	-2228.31	-2824.78	-2663.42	-2488.39	-2917.79	-2833.05
Barbados	14	5126.84	2954.88	1182.72	116.94	-689.704	-1648.11	-2373.42	-2176.19	-2949.74
Belgium-Luxembourg	15	-1489.81	-2030.62	-1876.19	-960.381	-931.67	-1715.77	-1973.81	-2893.18	-3061.18
Bangladesh	16	-67.415	-166.937	-118.246	-160.603	-253.102	-309.942	-389.325	-349.582	-422.408
Bermuda	17	-3957.44	-4282.89	-3731.04	-3643.18	-3846.83	-3415.11	-3194.01	-2836.79	-2865.48
Bolivia (Plurinational State of)	19	-456.067	-480.895	-289.511	-400.536	-398.609	-219.632	179.657	304.672	116.095
Botswana	20	-1057.98	-951.303	-627.35	-1298.3	-1743.02	-1647.76	-1562.55	-1774.37	-1717.13
Brazil	21	30.8178	105.979	411.198	104.53	261.256	80.9137	257.864	906.586	2160.98
Belize	23	2163.67	3751.57	4403.89	5628.09	4668.9	3698.84	3988.18	3806.38	3363.07
Solomon Islands	25	2283.88	1920.58	1870.14	3355.53	3041.98	2590.26	2357.72	1666.62	1337.95
Brunei Darussalam	26	-2064.1	-2170.64	-2021.41	-2604.74	-4249.13	-5892.28	-5528.49	-5860.11	-6368.83
Bulgaria	27	323.958	296.936	-1.81864	75.0563	-736.112	-541.551	107.63	550.815	797.315
Myanmar	28	516.635	191.524	84.9561	180.654	172.946	14.6165	126.843	160.966	312.005
Burundi	29	-14.9006	-30.2746	-28.4251	-59.857	-64.9315	-8.83586	-56.237	-79.4507	-169.173
Cameroon	32	572.678	596.641	503.436	258.974	182.846	21.1849	101.104	-33.4064	-25.8946
Canada	33	5061.46	3766.08	4412.19	5802.16	6699.98	6205.79	5982.53	4818.33	5426.45
Cape Verde	35	-468.64	-1538.73	-1706.99	-2559.02	-2756.83	-2759.62	-3069.19	-2598.28	-3281.3
Central African Republic	37	-6.82272	-25.1131	-20.3859	-43.5462	-46.3412	-166.829	-152.76	-113.533	-129.857
Sri Lanka	38	-684.175	-605.215	-634.913	-480.279	-478.789	-624.205	-719.133	-842.851	-744.127
Chad	39	124.761	-89.1136	-93.2903	-138.923	-151.033	-68.8428	-137.874	-66.2787	-62.4984
Chile	40	-248.41	-458.093	-680.664	-293.384	781.764	1158.73	544.26	-442.856	-817.904
Colombia	44	-67.092	-51.3198	-125.838	-152.123	-289.315	-169.211	-502.005	-617.676	-583.632
Comoros	45	-192.363	-339.32	-438.078	-632.664	-849.383	-858.779	-839.339	-822.406	-920.206
Congo	46	220.878	254.049	-136.501	-362.226	-393.197	-586.293	-590.379	-857.314	-1019.37
Costa Rica	48	401.535	862.973	1015.31	622.797	462.621	194.581	271.102	48.5055	158.954
Cuba	49	4347.76	4273.8	4048.91	5055.87	4598.92	4282.93	1522.43	913.273	-1392.24
Cyprus	50	-575.645	-1010.85	-2067.25	-953.113	-3873.07	-5285.49	-6266.57	-4962.36	-3427.55
Azerbaijan	52	-427.015	-581.487	-745.76	-1389.85	-1568.82	-1409.19	-1033.36	-898.843	-1269.08
Benin	53	173.872	186.647	113.547	-116.235	-173.543	-409.93	-507.345	-197.77	-392.909
Denmark	54	1268.45	1879.68	2960.23	3759.17	4197.52	5569.87	4974.28	3614.9	2017.58
Dominica	55	321.508	60.1312	-164.31	-1306.48	-1593.54	-4092.65	-5400.02	-4210.09	-4076.02
Dominican Republic	56	1403.94	1491.93	1415.54	799.551	190.126	-630.275	-1109.63	-1660.82	-1856
Belarus	57	-281.411	-447.811	-826.074	-1585.56	-1880.02	-1804.57	-1235.17	-1241.29	-270.104
Ecuador	58	432.849	348.952	215.33	67.7607	-30.7141	65.2309	378.387	191.316	229.18
Egypt	59	-506.166	-497.49	-806.464	-1482.89	-1842.51	-1531.36	-1418.12	-1510.81	-1302.3
El Salvador	60	-146.845	-23.1964	-11.7559	-320.85	-506.345	-641.285	-838.432	-951.257	-1054.01
Estonia	63	-64.4695	-284.07	-867.118	-1889.16	-2113.88	-2303.8	-668.893	-1836.1	-1078
Fiji	66	5341.51	4886.55	3376.66	4452.07	3388.19	3159.43	2821.6	1343.83	635.329
Finland	67	-418.919	-113.177	86.2013	-642.613	241.657	339.547	544.392	62.7592	588.467
France	68	582.392	1469.94	1743.67	2800.78	3487.22	4250.43	3708.43	3969.78	3186.52
French Polynesia	70	1862.64	-699.495	-1102.53	-1398.34	-2065.66	-2494.45	-2819.7	-3014.35	-3173.27
Djibouti	72	-1417.77	-1488.11	-1551.66	-1362.7	-1507.75	-1599.2	-1966.79	-2458.22	-3734.28
Georgia	73	-692.974	-622.145	-1063.53	-1910.17	-2430.91	-2057.74	-1443.97	-1755.42	-2292.84
Gabon	74	-73.8472	-182.209	-710.14	-917.857	-1019.92	-932.465	-1131.7	-1290.24	-1545.54
Gambia	75	1913.91	1721.19	1310.93	107.858	-631.138	-1290.64	-1243.76	-1687.84	-2061.99
Germany	79	-1404.22	-1387.09	-1135.61	-683.411	-307.311	-172.923	20.3026	337.811	-475.538
Bosnia and Herzegovina	80	338.347	-147.056	178.581	-188.191	-264.46	-196.961	-423.969	-978.589	-1698.79
Ghana	81	75.7939	-12.6483	-39.252	-74.7839	-123.813	-179.29	-109.754	-129.477	-393.353
Kiribati	83	6141.58	3685.3	3908.11	3977.76	2712.33	2673.39	2067.05	1435.14	-103.17
Greece	84	181.881	-106.797	-385.514	312.665	186.487	88.0942	-479.312	-1130.19	-1802.57
Grenada	86	-499.87	-612.72	-764.857	-962.648	-1248.38	-1793.61	-2377.17	-2229.45	-2559.37
Guatemala	89	-0.483196	84.2157	249.736	110.539	183.248	320.302	411.602	481.379	344.613
Guinea	90	-178.834	-106.024	-169.636	-270.317	-367.892	-600.954	-592.051	-522.504	-514.864
Guyana	91	5037.49	4451.45	3955.25	3868.74	2905.77	2215.95	5510.64	5399.56	4893.1
Haiti	93	-91.2438	-88.7666	-262.951	-450.558	-499.273	-647.742	-886.792	-1072.57	-1185.98
Honduras	95	546.649	530.218	209.419	352.421	383.237	82.9922	-183.728	-455.235	-380.269
Hungary	97	211.353	395.19	723.386	1463.6	1932.9	2320.55	1621.9	2154.85	2638.19
Croatia	98	333.474	-120.859	249.064	-103.156	233.06	304.387	-203.315	-185.74	-756.317
Iceland	99	9931.27	4707.67	8549.14	10704.8	10269.8	8818.83	12251.7	11712.2	8796.04
India	100	-136.208	-48.8789	-15.0396	-50.879	-60.3907	-9.79008	56.8414	-35.3008	-61.8026
Indonesia	101	-18.8057	0.5065	-78.6353	-56.7784	24.367	122.549	64.9142	267.406	936.296
Iran (Islamic Republic of)	102	-354.417	-348.732	-583.903	-995.182	-1193	-1324.41	-1146.01	-1350.1	-843.367
Ireland	104	-695.882	-206.565	290.016	1432.18	1935.37	2397.66	1815.31	1015.78	35.1274
Israel	105	-1888.82	-2222.01	-2228.7	-3034.72	-3346.94	-5408.82	-6164.02	-6262.54	-6387.85
Italy	106	-1043.4	-1239.92	-1235	-943.2	-797.95	-985.541	-976.586	-1184.61	-1825.83
Côte d'Ivoire	107	-33.4866	15.8359	294.339	74.1613	117.061	213.401	176.402	81.7142	-60.7313
Kazakhstan	108	1562.59	1946.5	1259.74	392.425	252.56	-30.7106	704.934	2215.69	1849.63
Jamaica	109	1274.37	123.964	-691.517	-1277.66	-1355.08	-1283.42	-1411.55	-1752	-2049.9
Japan	110	-1228.1	-1825.29	-1808.54	-2065.6	-2138.16	-2366.87	-2590.24	-2586.72	-2534.73
Jordan	112	-1596.11	-1281.98	-1735.82	-2267.78	-3183.93	-3788.61	-4180.47	-3890.99	-4499.84
Kyrgyzstan	113	-255.848	-440.968	-611.159	-1205.73	-1419.28	-1232.81	-764.158	-328.722	-651.522
Kenya	114	-20.8282	32.6933	150.282	-169.779	-168.37	-17.4251	-390.786	-539.931	-521.741
Cambodia	115	814.283	724.192	-650.909	-339.437	-249.85	-137.33	-190.933	14.531	212.667
Democratic People's Republic of Korea	116	-108.569	-251.669	-154.359	-190.541	-158.49	-214.732	-453.476	-636.626	-586.685
Republic of Korea	117	-193.604	-687.557	-908.571	-1362.42	-1738.72	-2328.61	-2821.32	-2835.73	-2964.04
Kuwait	118	-2515.4	-2571.7	-2539.94	-2806.83	-2779.35	-2592.68	-4192	-4444.36	-4493.44
Latvia	119	62.3588	-251.231	-528.248	-1083.01	-1143.22	-1182.52	-765.502	-633.763	-65.3017
Lao People's Democratic Republic	120	-295.509	-219.947	-413.637	-163.633	132.408	-33.4229	-132.021	322.727	570.785
Lebanon	121	-1542.39	-1791.32	-1897.11	-2255.95	-2272.96	-2466.56	-3220.4	-3410.89	-3350.53
Lesotho	122	-343.007	-757.067	-840.425	-1093.08	-1549.46	-1444.52	-1443.27	-1579.23	-2020.04
Liberia	123	-415.79	-397.905	-294.49	-518.907	-525.178	-642.586	-833.687	-793.989	-1081.76
Libya	124	-1909.87	-2846.42	-4240.89	-5173.89	-3812.11	-4178.81	-3947.88	-3818.84	-4022.88
Lithuania	126	323.063	158.522	-356.839	-1295.09	-1357.6	-1505.06	424.968	-306.727	646.534
Madagascar	129	180.005	86.2306	-62.1198	-229.882	-181.493	-54.0343	-30.9297	-237.791	-292.853
Malawi	130	243.891	193.736	174.436	245.705	120.204	-262.98	-243.755	31.4423	-96.3844
Malaysia	131	-672.181	-0.270201	1408.45	3139.99	4644	6457.13	7239.75	8803.28	11366.2
Maldives	132	-773.19	-677.354	-959.926	-1461.03	-1375.94	-1412.46	-1622.07	-1718.34	-1846.32
Mali	133	50.2415	-160.647	-109.11	-108.799	-264.931	-153.014	-182.439	-255.352	-111.931
Malta	134	-3556.46	-4187.21	-4752.67	-4251.29	-4321.67	-4765.83	-4837.38	-5167.32	-5608.27
Mauritania	136	-583.836	-696.317	-1212.87	-1308.15	-1687.26	-1740.37	-1606.91	-2056.43	-2130.25
Mauritius	137	6262.55	5594.89	5051.78	3595.11	3288.63	2506.57	1538.81	930.831	369.977
Mexico	138	448.517	136.869	-229.825	-584.939	-670.046	-975.012	-985.177	-1434.29	-1840.14
Mongolia	141	-79.0884	-588.023	-456.404	-725.308	-153.513	-172.485	-560.039	-885.439	-1209.52
Morocco	143	-329.43	-29.4467	-799.508	-1046.21	-1053.76	-714	-1277.53	-1882.39	-1557.02
Mozambique	144	274.403	357.662	168.046	-137.75	-327.182	-476.419	-351.273	-259.619	-481.758
Republic of Moldova	146	595.863	266.265	44.5139	-464.955	-444.874	-495.928	686.516	388.468	662.672
Namibia	147	-741.667	-693.626	-805.146	-905.231	-1011.95	-953.451	-772.169	-1050.06	-1011.66
Nepal	149	300.495	202.62	200.345	-34.6151	-55.4266	-85.1808	-62.3144	-62.2414	-116.996
Netherlands	150	-1730.01	-1454.01	-1004.19	-136.983	-259.147	-1956.37	-2721.85	-3899.49	-4456.9
Netherlands Antilles	151	-3836.88	-4015.71	-4223.41	-4861.67	-3857.41	-2979.32	-3333.7	-3497.08	-4039.72
New Caledonia	153	-2052.42	-2720.9	-2691.38	-2730.32	-2750.95	-2986.2	-3321.19	-3303.87	-3591.66
The former Yugoslav Republic of Macedonia	154	-1514.72	-691.38	-700.567	-1171.77	-781.57	-322.749	-1266.12	-1553.45	-1461.68
Vanuatu	155	7873.05	5637.04	5146.11	5229.62	4585.57	3306.87	2993.69	2171.58	1728.82
New Zealand	156	4339.65	5114.34	4655.43	5443.24	6486.65	4991.24	5243.68	5938.54	6001.59
Nicaragua	157	140.237	361.757	242.758	-12.4647	-350.943	-375.458	-194.177	-266.698	-44.6164
Niger	158	1118.79	391.406	-240.428	162.739	-416.709	-128.589	-420.78	-266.311	-261.485
Nigeria	159	307.791	138.534	-82.5862	-393.538	-244.033	-96.7805	-172.179	-305.425	-353.146
Norway	162	150.067	-7.28242	517.291	23.6014	-282.085	-1491.71	-1287.69	-1491.61	-2185.06
Pakistan	165	-202.517	-51.2498	-48.0744	30.956	-47.5303	-131.072	-179.812	-86.9881	-5.18491
Panama	166	-10.2683	41.1955	230.201	354.281	-74.122	-279.528	-500.817	-959.07	-1103.02
Czech Republic	167	-242.579	-232.695	-63.4762	-115.322	202.152	87.3208	127.403	-67.3663	76.0409
Paraguay	169	-30.8036	-65.5534	62.0538	116.794	45.6073	3065.39	3746.05	4837.53	7047.17
Peru	170	1548.09	1388.36	199.443	-306.682	-472.97	-239.948	-105.081	-256.31	-432.387
Philippines	171	652.97	597.731	781.445	694.297	380.448	215.928	40.3136	-157.759	-96.8909
Poland	173	-226.529	-394.121	-683.653	-1032	-443.204	-197.964	-205.836	-237.549	-125.388
Portugal	174	-626.576	-1157.24	-1845.19	-2613.62	-1915.34	-2511.91	-2940.32	-3570.51	-3883.39
Guinea-Bissau	175	260.875	-144.637	-163.126	-346.087	-265.656	-376.012	-275.868	21.6624	55.2392
Timor-Leste	176	-564.55	-559.516	-501.159	-547.195	-544.857	-411.494	-348.629	-587.777	-788.707
Eritrea	178	160.755	243.903	33.0988	-227.713	-609.708	-696.247	-964.925	-790.352	-934.484
Zimbabwe	181	504.514	954.255	908.599	644.966	380.746	162.276	126.283	-219.674	-595.483
Romania	183	900.148	574.299	276.026	-128.109	174.558	-326.676	271.491	-466.792	-609.803
Rwanda	184	-112.966	-26.8827	-39.7813	52.03	-71.586	-132.769	-327.519	-148.375	-237.709
Russian Federation	185	-91.1412	-385.175	-624.779	-1319.88	-1313.99	-1398.8	-795.069	-620.466	-136.821
Serbia and Montenegro	186	534.056	8.33634	438.093	-71.1026	86.725	220.037	119.785	209.048	573.045
Saint Kitts and Nevis	188	6006.64	4048.34	4570.53	6007.23	3671.01	3034.01	2851.09	1127.12	-495.061
Saint Lucia	189	993.086	465.968	-29.9636	-426.557	-513.132	-299.202	-926.701	-2007.35	-2334.54
Saint Vincent and the Grenadines	191	652.441	-264.29	-560.828	-713.911	-289.33	-174.2	-1143.28	-1762.09	-2055.35
Sao Tome and Principe	193	1813.08	1386.55	-430.687	-720.491	-763.498	-1101.31	-658.065	-809.195	-1099.84
Saudi Arabia	194	-943.296	-1189.77	-1470.97	-3518.03	-3338.2	-1608.92	-2973.36	-3263.55	-3267
Senegal	195	1350.53	-25.3094	44.7573	-307.543	-743.336	-700.018	-852.005	-1078.32	-1474.98
Seychelles	196	1611.62	443.979	-683.499	-1271.52	-1778.88	-3043.43	-3720.05	-3627.45	-5937.06
Sierra Leone	197	-195.831	-293.036	-147.101	-285.41	-348.795	-424.393	-497.777	-811.022	-369.071
Slovenia	198	-1967.06	-2021.97	-1436.43	-2375.7	-1519.39	-1452.78	-2868.77	-2688.55	-2808.5
Slovakia	199	-2878.87	-2646.17	-1445.21	-964.683	-335.703	-223.364	-73.8978	-35.8326	315.843
South Africa	202	1274.6	1163.22	1134.28	1488.82	-138.121	70.0169	-53.5835	-235.228	-621.904
Spain	203	-437.957	-445.963	-706.397	-777.273	-508.712	-840.501	-1385.44	-1688.24	-2350.87
Sudan	206	207.643	0.311204	305.109	1.47025	-228.303	-159.158	-134.749	-221.743	-146.928
Suriname	207	-139.486	-132.386	160.428	925.483	1366.83	-142.385	36.4414	-942.931	-1237.74
Tajikistan	208	-1091.37	-988.793	-1517.24	-2486.32	-2719.69	-2167.63	-1174.08	-958.452	-1232.59
Swaziland	209	1984.89	2754.2	2885.23	3910.88	4749.41	3824.55	3073.96	2769.76	3197.13
Sweden	210	-292.067	-22.1257	268.506	178.693	363.83	110.68	149.133	463.768	-76.0802
Switzerland	211	-2410.02	-2537.88	-2394.75	-2124.22	-2069.65	-1828.57	-1705.61	-1817.66	-1991.79
Syrian Arab Republic	212	159.073	-438.502	-517.9	-536.49	-1298.34	-961.928	-437.787	-850.45	-1025.91
Turkmenistan	213	-937.975	-935.146	-1630.33	-2765.93	-2987.04	-2518.76	-1197.15	-406.738	-92.7598
United Republic of Tanzania	215	130.988	-29.1902	-77.5077	-39.0501	-39.0774	-47.7846	-161.151	-180.502	-322.678
Thailand	216	1092.78	1171.2	1645.64	2292.21	2670.83	2549.75	2303.46	2391.86	2952.64
Togo	217	130.977	131.165	-7.24819	-185.415	-210.434	-305.18	-194.966	-392.544	-506.54
Trinidad and Tobago	220	123.732	-171.172	-1091.3	-2405.41	-2766.96	-2537.39	-2149.54	-2156.23	-2685.9
Tunisia	222	-315.686	-691.043	-531.156	-1185.38	-1276.15	-1411.88	-1650.15	-1970.27	-1463.87
Turkey	223	-128.051	-37.2641	139.91	331.342	64.7471	149.227	-17.5634	-1.25524	-203.174
United Arab Emirates	225	-3130.89	-5947.22	-6570.18	-5871.43	-6203.07	-7105.25	-6672.43	-7354.6	-8489.5
Uganda	226	65.1571	132.801	72.1259	-51.4782	-27.6567	-32.1957	-136.481	-129.569	-232.965
United Kingdom	229	-2520.08	-2536.05	-2133.28	-1188.63	-639.969	-752.765	-745.959	-1048.17	-1453.43
Ukraine	230	590.789	440.296	231.015	-135.603	-140.788	-255.168	673.124	1002.21	1611.1
United States of America	231	1233.95	1293.37	2866	4091.58	3543.39	2860.92	3049.42	3082.72	3328.41
Burkina Faso	233	-7.5853	-118.699	-47.8842	-107.995	-147.431	-169.148	-370.471	-199.135	-280.951
Uruguay	234	311.683	255.309	802.719	1130.34	1388.9	1883.98	2565.93	2655.96	5230.09
Uzbekistan	235	-708.777	-711.076	-999.255	-1683.68	-1937.41	-1566.88	-948.906	-372.692	-314.871
Venezuela (Bolivarian Republic of)	236	-741.884	-683.278	-1019.02	-1608.02	-1502.03	-1361.48	-1380.59	-1297.15	-1375.93
Viet Nam	237	-183.164	-388.543	-330.764	-208.671	-37.636	177.111	320.617	568.421	701.46
Ethiopia	238	139.245	209.446	2.94281	-14.3495	-102.411	-168.974	-72.8118	-196.147	-82.1314
Samoa	244	1474.23	1297.28	1147.41	1323.71	1074.14	-39.7758	-572.564	-860.694	-909.146
Yemen	249	-355.67	-595.267	-636.233	-1051.07	-1503.31	-1520	-1539.15	-1649.15	-1656.92
Democratic Republic of the Congo	250	104.17	101.064	-28.3931	-64.8667	-26.6937	-10.3129	-50.9099	-120.638	-317.382
Zambia	251	-114.115	-116.018	457.024	-463.894	-268.533	-60.3568	-289.708	-620.102	-354.216
China	351	-28.041	-35.1884	-53.5833	-135.146	-25.2389	44.8514	-69.1213	-289.336	-465.253

## Sheet: ANIMAL_CAL
DataS1
For article Porkka et al: From food insufficiency towards trade dependency: A historical analysis of global food availability.
		Animal based calories (% of DES)
Country	FAO ID	1965	1970	1975	1980	1985	1990	1995	2000	2005
Armenia	1	0.141617	0.162755	0.17397	0.171801	0.172199	0.181124	0.149591	0.1595	0.209078
Albania	3	0.093886	0.0924114	0.09399	0.104964	0.103829	0.131302	0.20116	0.212323	0.245827
Algeria	4	0.0861338	0.0891333	0.0969702	0.10753	0.127254	0.114035	0.104044	0.0999812	0.107926
Angola	7	0.0636352	0.0675481	0.0732353	0.100694	0.131048	0.11639	0.0825088	0.0783453	0.0794042
Antigua and Barbuda	8	0.202728	0.233594	0.257854	0.322321	0.360835	0.36026	0.343445	0.332553	0.338306
Argentina	9	0.297364	0.297867	0.313693	0.320917	0.313321	0.303748	0.310528	0.305019	0.291019
Australia	10	0.384535	0.381105	0.372208	0.342168	0.339801	0.338314	0.328795	0.322839	0.324702
Austria	11	0.299467	0.308925	0.325614	0.344017	0.351881	0.337846	0.34015	0.325547	0.299714
Bahamas	12	0.306978	0.334824	0.334187	0.334231	0.350671	0.342806	0.323263	0.327552	0.316193
Barbados	14	0.217277	0.257253	0.279593	0.27116	0.275704	0.27372	0.25169	0.236913	0.247915
Belgium-Luxembourg	15	0.354932	0.37119	0.379148	0.388066	0.391732	0.377567	0.356202	0.350454	0.343844
Bangladesh	16	0.0319146	0.032869	0.0335734	0.030803	0.0290375	0.0286966	0.0325297	0.0327266	0.0360812
Bermuda	17	0.415806	0.398998	0.406756	0.408702	0.341268	0.33788	0.315543	0.310702	0.297147
Bolivia (Plurinational State of)	19	0.16244	0.169279	0.175491	0.195749	0.170252	0.155747	0.157698	0.160892	0.171037
Botswana	20	0.166133	0.161399	0.151533	0.147109	0.141033	0.191587	0.172841	0.16114	0.13658
Brazil	21	0.142238	0.140681	0.148566	0.152841	0.157643	0.169453	0.197914	0.222868	0.217978
Belize	23	0.262678	0.27461	0.290125	0.294649	0.301891	0.243577	0.219127	0.210919	0.204856
Solomon Islands	25	0.108636	0.129293	0.135756	0.132385	0.123521	0.111298	0.0961681	0.0782974	0.0759921
Brunei Darussalam	26	0.11607	0.117602	0.140841	0.178839	0.14519	0.113177	0.116313	0.114292	0.134182
Bulgaria	27	0.14072	0.148904	0.180414	0.206574	0.235426	0.238887	0.228498	0.224239	0.214715
Myanmar	28	0.0542143	0.0513834	0.0502641	0.0516918	0.0560933	0.0510786	0.0528374	0.0655111	0.106543
Burundi	29	0.0225778	0.027879	0.0332208	0.033423	0.0319943	0.0305951	0.026977	0.0220125	0.0246318
Cameroon	32	0.043246	0.0484489	0.0463526	0.0537219	0.0616043	0.064434	0.0568884	0.0584868	0.0555347
Canada	33	0.361301	0.35069	0.336261	0.324176	0.306505	0.301676	0.264028	0.265815	0.261263
Cape Verde	35	0.0559496	0.0924311	0.137913	0.144929	0.149613	0.156281	0.178516	0.19533	0.206661
Central African Republic	37	0.040531	0.0450127	0.0520975	0.0627665	0.0900326	0.101147	0.107073	0.109988	0.114022
Sri Lanka	38	0.0515741	0.0454726	0.0384289	0.0452236	0.0493834	0.0555662	0.059522	0.0634113	0.0656018
Chad	39	0.0724461	0.0722313	0.0764052	0.0898097	0.0877813	0.0862584	0.0750923	0.0708055	0.0639595
Chile	40	0.151505	0.15818	0.143474	0.153886	0.151838	0.18595	0.219918	0.224039	0.23698
Colombia	44	0.201132	0.185109	0.168934	0.1634	0.166489	0.181361	0.185759	0.184018	0.190437
Comoros	45	0.0337487	0.0425248	0.0487912	0.0505594	0.0504474	0.0613547	0.061894	0.0534002	0.0632129
Congo	46	0.0494809	0.0542011	0.0514833	0.0593482	0.0710249	0.0783701	0.0755055	0.0590541	0.0708472
Costa Rica	48	0.145096	0.152022	0.168112	0.178414	0.165616	0.168377	0.18474	0.194387	0.201554
Cuba	49	0.206225	0.238918	0.242454	0.243867	0.220903	0.204044	0.143076	0.114352	0.105987
Cyprus	50	0.147725	0.193049	0.195808	0.200399	0.227394	0.267673	0.274477	0.290439	0.28294
Azerbaijan	52	0.142877	0.162814	0.171616	0.170007	0.170525	0.177507	0.140717	0.136399	0.12504
Benin	53	0.0430963	0.0471318	0.0498789	0.0496113	0.0530167	0.0379736	0.037601	0.039824	0.0433976
Denmark	54	0.382654	0.390426	0.367285	0.376941	0.360388	0.402853	0.405355	0.392422	0.38009
Dominica	55	0.161042	0.170123	0.166148	0.17146	0.185283	0.200303	0.217367	0.232822	0.235317
Dominican Republic	56	0.123713	0.127291	0.119001	0.130137	0.121406	0.137281	0.148388	0.148867	0.149761
Belarus	57	0.234448	0.261292	0.281442	0.291544	0.340516	0.376815	0.290867	0.276918	0.263658
Ecuador	58	0.165193	0.168047	0.170284	0.173234	0.166024	0.160534	0.188378	0.202441	0.230038
Egypt	59	0.0632687	0.0650927	0.0653105	0.0700818	0.0746933	0.0670842	0.0669887	0.0750735	0.0791757
El Salvador	60	0.120742	0.104933	0.111833	0.1142	0.105199	0.107385	0.113134	0.129015	0.155474
Estonia	63	0.291779	0.319858	0.337755	0.342205	0.365763	0.393313	0.318798	0.276314	0.264605
Fiji	66	0.129241	0.143266	0.186273	0.195432	0.18038	0.199262	0.201406	0.184285	0.174917
Finland	67	0.396732	0.398994	0.414122	0.417016	0.416139	0.386138	0.389697	0.379768	0.369274
France	68	0.319379	0.344309	0.359035	0.378619	0.377829	0.376478	0.376018	0.37572	0.354124
French Polynesia	70	0.181056	0.209686	0.20328	0.221005	0.243542	0.276207	0.296262	0.304688	0.315553
Djibouti	72	0.145401	0.131533	0.144659	0.173412	0.157544	0.113384	0.112568	0.113873	0.115472
Georgia	73	0.17607	0.19176	0.198913	0.197036	0.200193	0.20741	0.166082	0.180692	0.189282
Gabon	74	0.110592	0.112538	0.117589	0.141761	0.149531	0.131278	0.144773	0.134498	0.142243
Gambia	75	0.0516849	0.055784	0.0675794	0.0622156	0.0577222	0.0499512	0.0509594	0.0572544	0.0640258
Germany	79	0.309076	0.317396	0.322074	0.326653	0.334279	0.327798	0.317473	0.307882	0.303282
Bosnia and Herzegovina	80	0.142109	0.16503	0.191347	0.211702	0.214141	0.226524	0.184129	0.200188	0.19504
Ghana	81	0.0445669	0.0544807	0.0631395	0.0600025	0.0540554	0.0525383	0.0422269	0.0447564	0.0441268
Kiribati	83	0.118961	0.104678	0.111123	0.107078	0.109592	0.113591	0.121194	0.126489	0.131145
Greece	84	0.161289	0.176073	0.191098	0.201629	0.213835	0.208766	0.224574	0.227251	0.229804
Grenada	86	0.134924	0.163335	0.196156	0.202518	0.228286	0.228868	0.222847	0.243121	0.269597
Guatemala	89	0.0906164	0.0901564	0.0780089	0.0729053	0.0716576	0.0719354	0.0855917	0.0961251	0.0978791
Guinea	90	0.0232029	0.0228848	0.0267703	0.0284996	0.0269107	0.0275008	0.0313894	0.0344181	0.0370503
Guyana	91	0.13046	0.140241	0.122424	0.115673	0.0786716	0.0890048	0.132476	0.158639	0.152741
Haiti	93	0.0666481	0.0673873	0.0724507	0.0678158	0.074554	0.0631659	0.0646203	0.069941	0.0749711
Honduras	95	0.116364	0.1211	0.11636	0.12172	0.115352	0.11567	0.135266	0.145979	0.153424
Hungary	97	0.304883	0.333929	0.341289	0.354229	0.368994	0.359783	0.330807	0.318029	0.301839
Croatia	98	0.117825	0.128527	0.145146	0.15628	0.150147	0.151887	0.204745	0.199283	0.221293
Iceland	99	0.487584	0.487214	0.49876	0.481534	0.474283	0.432219	0.430199	0.443511	0.449516
India	100	0.051229	0.0490088	0.0516803	0.054991	0.0597251	0.0609805	0.0675908	0.0760165	0.082867
Indonesia	101	0.0320917	0.0314066	0.0309363	0.0340676	0.0395911	0.0449593	0.0528041	0.0510003	0.0588497
Iran (Islamic Republic of)	102	0.0947051	0.0921742	0.10108	0.10727	0.0966289	0.0830064	0.0851625	0.0898306	0.10761
Ireland	104	0.360001	0.364145	0.36606	0.376792	0.351753	0.316906	0.301686	0.322662	0.308039
Israel	105	0.185553	0.188044	0.199516	0.199484	0.194953	0.194054	0.199116	0.206232	0.215481
Italy	106	0.165569	0.181923	0.20376	0.230121	0.256377	0.25658	0.258977	0.261424	0.256716
Côte d'Ivoire	107	0.0516648	0.0606786	0.0603395	0.061129	0.0575981	0.0585359	0.0426343	0.0390677	0.0407627
Kazakhstan	108	0.195087	0.217861	0.231654	0.231437	0.236112	0.247008	0.211182	0.248555	0.251192
Jamaica	109	0.165095	0.181423	0.173001	0.16376	0.163655	0.156071	0.175186	0.188886	0.195026
Japan	110	0.145755	0.181122	0.196174	0.201555	0.210155	0.212482	0.213478	0.211248	0.209188
Jordan	112	0.0704748	0.0931906	0.0949299	0.120977	0.136437	0.12007	0.116623	0.116663	0.119348
Kyrgyzstan	113	0.2183	0.241816	0.247322	0.238871	0.228913	0.24607	0.226515	0.237616	0.211768
Kenya	114	0.0986804	0.0971675	0.0924734	0.0969409	0.112905	0.132425	0.111841	0.110526	0.124378
Cambodia	115	0.0435708	0.0596031	0.0571517	0.0379186	0.0652354	0.0743416	0.0773174	0.0915336	0.0945975
Democratic People's Republic of Korea	116	0.0747452	0.0789727	0.0926897	0.106999	0.119383	0.10469	0.0594877	0.065875	0.0754111
Republic of Korea	117	0.0317726	0.0423226	0.059871	0.077976	0.0920301	0.104587	0.130216	0.1425	0.154817
Kuwait	118	0.203899	0.202897	0.217694	0.255407	0.249703	0.236009	0.246378	0.220534	0.207606
Latvia	119	0.301176	0.331893	0.34963	0.357247	0.368599	0.368918	0.306899	0.26831	0.289472
Lao People's Democratic Republic	120	0.0557304	0.0542729	0.0429483	0.0522493	0.0561607	0.0555214	0.0668553	0.0722455	0.0823525
Lebanon	121	0.152188	0.142674	0.137359	0.172177	0.161142	0.140634	0.14565	0.155178	0.160809
Lesotho	122	0.0677435	0.0685017	0.0720552	0.0781218	0.0891556	0.0602749	0.0527828	0.0522381	0.0537722
Liberia	123	0.0413496	0.04075	0.0396731	0.0405806	0.0433826	0.0348524	0.0340723	0.0298753	0.0314651
Libya	124	0.0806915	0.0970578	0.092309	0.103686	0.141882	0.137524	0.12474	0.111977	0.109589
Lithuania	126	0.233905	0.260868	0.28324	0.297018	0.32835	0.340754	0.268152	0.233941	0.280008
Madagascar	129	0.119506	0.110208	0.0980538	0.10854	0.103971	0.110141	0.106883	0.0843007	0.0753411
Malawi	130	0.0321423	0.0387574	0.0383587	0.0413884	0.0372286	0.0319747	0.0298028	0.0275441	0.0286237
Malaysia	131	0.106208	0.108745	0.129883	0.141969	0.156561	0.18571	0.206636	0.183948	0.18046
Maldives	132	0.074093	0.108986	0.105395	0.0819643	0.131564	0.136494	0.192148	0.228528	0.252912
Mali	133	0.135143	0.137328	0.1186	0.144018	0.106439	0.0981585	0.0914726	0.0908064	0.095075
Malta	134	0.208382	0.241667	0.259058	0.275831	0.274605	0.270149	0.265075	0.27952	0.268385
Mauritania	136	0.311043	0.318481	0.259309	0.262124	0.238697	0.197592	0.16837	0.175299	0.182408
Mauritius	137	0.0745036	0.0746932	0.0940682	0.104207	0.100479	0.128253	0.131305	0.143276	0.149308
Mexico	138	0.124849	0.127472	0.150927	0.166542	0.165845	0.15773	0.165555	0.182409	0.194831
Mongolia	141	0.428891	0.428952	0.410878	0.382489	0.352392	0.396703	0.423597	0.402408	0.326932
Morocco	143	0.0698568	0.0730401	0.0613106	0.0650475	0.0588637	0.070491	0.0694748	0.0697674	0.0733127
Mozambique	144	0.0324589	0.0364539	0.0324519	0.031853	0.0353692	0.0294508	0.0505425	0.0563614	0.0428674
Republic of Moldova	146	0.215973	0.230846	0.234024	0.229633	0.236793	0.248392	0.175686	0.171154	0.187672
Namibia	147	0.172626	0.166668	0.153981	0.150399	0.122464	0.123824	0.113489	0.163311	0.147611
Nepal	149	0.0795984	0.0786382	0.082031	0.0832195	0.0777073	0.0671858	0.0659661	0.0667727	0.0668381
Netherlands	150	0.334641	0.353734	0.360331	0.372345	0.37316	0.33189	0.344047	0.353953	0.325723
Netherlands Antilles	151	0.292731	0.324171	0.350385	0.40834	0.350768	0.298788	0.29353	0.296797	0.232177
New Caledonia	153	0.209312	0.226571	0.23384	0.221394	0.213399	0.213629	0.242943	0.24642	0.259138
The former Yugoslav Republic of Macedonia	154	0.11126	0.126685	0.140123	0.149606	0.153876	0.15299	0.191161	0.182071	0.202336
Vanuatu	155	0.194915	0.201037	0.207137	0.185131	0.170179	0.158197	0.16094	0.153451	0.142764
New Zealand	156	0.439497	0.45855	0.452485	0.421251	0.41785	0.380551	0.343874	0.304018	0.320108
Nicaragua	157	0.168553	0.184219	0.195848	0.151334	0.132832	0.117319	0.0905333	0.112673	0.115687
Niger	158	0.112319	0.109097	0.0942467	0.105923	0.0874171	0.0816199	0.0900212	0.0926358	0.100569
Nigeria	159	0.0287674	0.0329564	0.0406252	0.0577461	0.0449585	0.0328849	0.029739	0.0311049	0.0320725
Norway	162	0.418648	0.399551	0.406014	0.392366	0.374105	0.344497	0.334026	0.314146	0.310629
Pakistan	165	0.167831	0.147932	0.145426	0.147048	0.151783	0.163515	0.174888	0.186811	0.203095
Panama	166	0.174971	0.180419	0.191435	0.199185	0.191329	0.20263	0.205029	0.211529	0.209599
Czech Republic	167	0.349352	0.369702	0.386551	0.404097	0.409172	0.388821	0.350742	0.341386	0.335616
Paraguay	169	0.187006	0.175752	0.165027	0.188976	0.183865	0.210709	0.242206	0.228441	0.198082
Peru	170	0.143373	0.137587	0.137257	0.143944	0.164956	0.149138	0.147499	0.130936	0.110876
Philippines	171	0.112283	0.12922	0.112374	0.105367	0.104078	0.12302	0.136192	0.150579	0.153607
Poland	173	0.259307	0.284705	0.306731	0.303192	0.298121	0.307519	0.265549	0.262804	0.265448
Portugal	174	0.141609	0.148616	0.161702	0.178941	0.189106	0.225574	0.259415	0.288154	0.290141
Guinea-Bissau	175	0.0799036	0.090026	0.08504	0.0782635	0.0711793	0.0702891	0.0695054	0.0667278	0.0622655
Timor-Leste	176	0.223418	0.205762	0.166475	0.111513	0.122114	0.136755	0.127296	0.125569	0.104284
Eritrea	178	0.107983	0.0966162	0.0959221	0.0831453	0.0832138	0.073791	0.0559799	0.0638282	0.048527
Zimbabwe	181	0.08192	0.089126	0.0962686	0.0860249	0.0835147	0.0870501	0.0761583	0.0868535	0.0852773
Romania	183	0.153206	0.185581	0.224783	0.244108	0.249921	0.25768	0.244935	0.227042	0.247894
Rwanda	184	0.0181109	0.0164489	0.0184259	0.0250225	0.0277873	0.0288288	0.0340227	0.0310887	0.0325073
Russian Federation	185	0.232397	0.261929	0.281566	0.285208	0.298366	0.311075	0.259388	0.224825	0.224094
Serbia and Montenegro	186	0.215701	0.234037	0.266985	0.28984	0.293176	0.291737	0.350851	0.370611	0.350392
Saint Kitts and Nevis	188	0.147408	0.193907	0.180729	0.220275	0.227225	0.220577	0.25449	0.282373	0.277046
Saint Lucia	189	0.150452	0.179761	0.1812	0.195361	0.214968	0.248781	0.276119	0.299945	0.316908
Saint Vincent and the Grenadines	191	0.108956	0.13188	0.116836	0.108691	0.130715	0.173606	0.183583	0.174613	0.192102
Sao Tome and Principe	193	0.0496241	0.0574114	0.0514327	0.0702905	0.0688712	0.0524137	0.0478757	0.0481224	0.0665469
Saudi Arabia	194	0.0750384	0.0879276	0.125863	0.152059	0.169371	0.143086	0.127328	0.139423	0.141718
Senegal	195	0.0751554	0.0799141	0.0812629	0.0791896	0.0876415	0.0955825	0.0877037	0.081128	0.0812353
Seychelles	196	0.0978649	0.113748	0.13902	0.143488	0.152768	0.161564	0.185732	0.175972	0.195835
Sierra Leone	197	0.040122	0.0383512	0.044794	0.0461789	0.038294	0.0346413	0.03182	0.032208	0.0422947
Slovenia	198	0.174294	0.197019	0.223451	0.245735	0.244583	0.242631	0.294331	0.284549	0.292712
Slovakia	199	0.17698	0.185374	0.197342	0.207854	0.212544	0.20076	0.269711	0.256936	0.247637
South Africa	202	0.151471	0.155371	0.150246	0.144375	0.138349	0.139578	0.130768	0.120721	0.134253
Spain	203	0.1554	0.189047	0.204713	0.227281	0.243412	0.250472	0.261478	0.277734	0.278774
Sudan	206	0.187906	0.166592	0.156682	0.193338	0.190396	0.1858	0.192743	0.226458	0.238812
Suriname	207	0.122531	0.129073	0.140727	0.151704	0.139893	0.139848	0.124559	0.12582	0.120017
Tajikistan	208	0.104663	0.121112	0.126797	0.12223	0.120251	0.128658	0.102845	0.0793135	0.0879233
Swaziland	209	0.146041	0.132177	0.126677	0.133748	0.11329	0.105733	0.111967	0.131004	0.144095
Sweden	210	0.327234	0.319367	0.334885	0.355525	0.35568	0.348815	0.340893	0.339534	0.346589
Switzerland	211	0.312968	0.329571	0.359283	0.377133	0.387219	0.371208	0.353765	0.33724	0.330374
Syrian Arab Republic	212	0.138856	0.114432	0.121747	0.154855	0.149638	0.130817	0.125913	0.130345	0.144381
Turkmenistan	213	0.201992	0.221536	0.224622	0.216738	0.210547	0.218198	0.188275	0.197207	0.218385
United Republic of Tanzania	215	0.0779297	0.0878472	0.0708297	0.0629243	0.0636655	0.0694664	0.0661778	0.0622909	0.0575191
Thailand	216	0.0763995	0.0837946	0.0806418	0.0852891	0.0913497	0.106941	0.126445	0.118445	0.124522
Togo	217	0.0341148	0.0334177	0.0387801	0.0357688	0.0437032	0.0446171	0.0380329	0.0343653	0.0348561
Trinidad and Tobago	220	0.165633	0.174407	0.173022	0.192226	0.203281	0.156206	0.157515	0.164633	0.186432
Tunisia	222	0.0767586	0.075981	0.0919891	0.0892238	0.092243	0.0918004	0.090612	0.103583	0.10763
Turkey	223	0.155069	0.140186	0.134381	0.131625	0.120242	0.11242	0.114443	0.106517	0.114817
United Arab Emirates	225	0.264466	0.185644	0.157175	0.194048	0.176638	0.140214	0.192745	0.1762	0.172375
Uganda	226	0.0602889	0.0597958	0.0637353	0.0692318	0.0611458	0.0676771	0.0657777	0.0607102	0.0644245
United Kingdom	229	0.374274	0.371947	0.363807	0.359812	0.33685	0.317201	0.305098	0.29458	0.304455
Ukraine	230	0.198584	0.222234	0.236841	0.239322	0.250247	0.262194	0.216774	0.204739	0.206671
United States of America	231	0.339512	0.327114	0.301386	0.296307	0.293807	0.279437	0.272196	0.272102	0.270982
Burkina Faso	233	0.0459109	0.049353	0.0432263	0.0555511	0.053515	0.0481215	0.0506318	0.0546532	0.0559289
Uruguay	234	0.378398	0.384756	0.36636	0.36401	0.347428	0.346337	0.34797	0.320448	0.22936
Uzbekistan	235	0.173944	0.199364	0.205186	0.196206	0.191727	0.201341	0.170751	0.170441	0.173481
Venezuela (Bolivarian Republic of)	236	0.147531	0.145294	0.170227	0.175843	0.165531	0.159475	0.162637	0.176701	0.165891
Viet Nam	237	0.0735783	0.0681719	0.0573691	0.0621174	0.0793339	0.0870084	0.0980052	0.113074	0.150085
Ethiopia	238	0.0937052	0.0920108	0.084512	0.0734253	0.0750432	0.0660337	0.0511617	0.0471648	0.0479173
Samoa	244	0.161235	0.145073	0.141091	0.181688	0.224107	0.268136	0.287953	0.286342	0.269741
Yemen	249	0.105085	0.080833	0.0785952	0.114021	0.102199	0.0801816	0.0670975	0.0716139	0.0886142
Democratic Republic of the Congo	250	0.0332644	0.034354	0.0303682	0.0253984	0.0274648	0.0238978	0.0236606	0.0246199	0.0238379
Zambia	251	0.0609032	0.068369	0.0639668	0.0547465	0.0478894	0.0536983	0.0533735	0.0546315	0.0524729
China	351	0.0622265	0.0657501	0.0681416	0.0768953	0.092842	0.12454	0.16316	0.193988	0.212745
